# Supplementary material for: Amino acid-based ionic liquids as precursors for the synthesis of chiral nanoporous carbons
Source: Royal Society of Chemistry journal article supplement (doi:10.1039/c9na00520j), 2019-01-01
Supplement: c9na00520j1.pdf [file c9na00520j1.pdf]

## Electronic supplementary information

# Amino acid -based ionic liquids as precursors for the synthesis of chiral nanoporous carbons

*Sapir Shekef Aloni, Milena Perovic, Michal Weitman, Reut Cohen, Martin Oschatz and Yitzhak Mastai\**

Department of Chemistry and the Institute of Nanotechnology, Bar-Ilan University, Ramat-Gan 5290002, Israel.

Max Planck Institute of Colloids and Interfaces, Potsdam-Golm Science Park, Am Mühlenberg 1 OT Golm Potsdam 14476, Germany.

E-mail: [Yitzhak.Mastai@biu.ac.il](mailto:Yitzhak.Mastai@biu.ac.il)

## Experimental Section

### Materials Synthesis

#### Preparation of Trimethyl Tyr-OMeBF<sub>4</sub>

N,N,N trimethyl Phe-OMeBF<sub>4</sub> and N,N,N trimethyl Tyr-OMeBF<sub>4</sub> was synthesized by following steps. Phenylalanine methyl ester hydrochloride/ Tyrosine methyl ester hydrochloride (5.0 g) was placed in 250 mL round bottomed flask and 120 mL acetone was added. Iodomethane (18.81 g, 6 eq.) was added followed by addition of potassium hydrogen carbonate (11.63 g, 5 eq.) and the mixture (suspension) was stirred well. After 48 h the solvent was evaporated. Chloroform (20 mL) was added to the residue and the mixture was stirred well. The solvent (contains impurities) was removed by filtration (by suction). Purification: 40 mL water was added to the crude solid (~15 g; apparently contains the product and KHCO<sub>3</sub> + KI + KCl) and the mixture was stirred at 50 °C for 0.5 h. The mixture (suspension) was allowed to

cool to RT. The white solid was filtered (suction), washed with very cold water (up to maximum 5 mL) and dried to give 7.16 g of N,N,N-trimethyl-L-phenylalanine methyl ester iodide/ N,N,N-trimethyl-L-tyrosine methyl ester iodide (purity confirmed by  $^1\text{H}$  NMR).

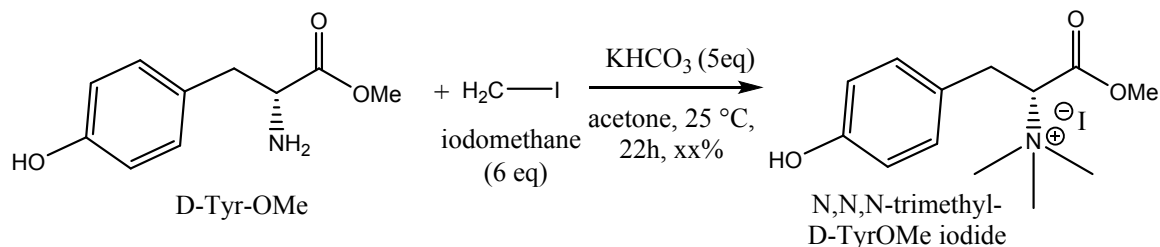

**Figure S1.** Pathway for the synthesis of N,N,N trimethyl Tyr-OMeBF<sub>4</sub> ionic liquid.

**$^1\text{H}$  NMR ( $\text{D}_2\text{O}$ , 400 MHz):**  $\text{C}_{13}\text{H}_{20}\text{INO}_2$ , 365 (238+127); 7.14 (d, 2H), 6.87 (d, 2H), 4.43 (dd,  $J = 12, 5$  Hz, 1H), 3.61 (s, 3H), 3.32 (s, 9H), 3.47 (dd,  $J = 12, 5$  Hz, 1H), 3.21 (t,  $J = 12$  Hz, 1H).  **$^{13}\text{C}$  NMR ( $\text{D}_2\text{O}$ , 600 MHz):** 168.61 (C), 155.97 (C), 131.57 (2xCH), 125.10 (CH), 116.61 (2xCH), 76.42 (CH), 54.28 (CH<sub>3</sub>), 53.29 (3xCH<sub>3</sub>), 32.23 (CH<sub>2</sub>). MS  $m/z$  (ES<sup>+</sup>) 238 ( $\text{M}^+$ , 100). **MS  $m/z$  (ES<sup>+</sup>):** MS  $m/z$  (ES<sup>+</sup>) 238 ( $\text{M}^+$ , 100).

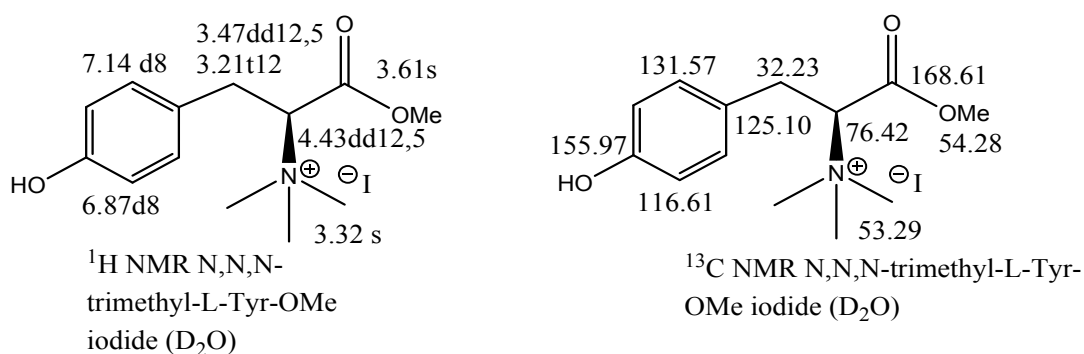

**Figure S2.**  $^1\text{H}$  NMR and  $^{13}\text{C}$  NMR of N,N,N trimethyl Tyr-OMeBF<sub>4</sub>.

### Preparation of Me<sub>2</sub>-L-proline methyl ester iodide

N,N dimethyl Pro-OMeBF<sub>4</sub> was synthesized by following steps. Potassium carbonate (6.9 g, 2 eq.) was placed in 250 mL round bottomed flask and acetonitrile (MeCN, 100 mL) was added.

The mixture was stirred vigorously for 10 min. L-proline (2.87 g) was added and the mixture was stirred for additional 10 min. Iodomethane (21.3 g, 6 eq.) was added and the mixture (suspension) was stirred well. After 72 h the mixture was filtered (to remove salts) and evaporated. The crude solid was stirred for 30 min with chloroform (25 mL) and the remained non-dissolved solid was removed. Evaporation gave 5.7 gr of product N,N-Dimethyl-L-proline methyl ester iodide (purity confirmed by  $^1\text{H}$  NMR).

**$^1\text{H}$  NMR ( $\text{CDCl}_3$ , 600 MHz):**  $\text{C}_8\text{H}_{16}\text{INO}_2$  285 (158+127); 5.41 (t,  $J = 10$  Hz, 1H), 4.49 (q,  $J = 10$  Hz, 1H), 4.12 (ddd,  $J = 10, 8, 2$  Hz, 1H), 3.86 (s, 3H), 3.76 (s, 3H), 3.27 (s, 3H), 2.80 (tdd,  $J = 14, 10, 5$  Hz, 1H), 2.46 (qdd,  $J = 14, 10, 2$  Hz, 1H), 2.31 (dtd,  $J = 14, 10, 5$  Hz, 1H), 2.21 (qdd,  $J = 14, 8, 5$  Hz, 1H)  **$^{13}\text{C}$  NMR ( $\text{CDCl}_3$ , 600 MHz):** 166.21 (C), 73.40 (CH), 67.99 (CH<sub>2</sub>), 53.62 (CH<sub>3</sub>), 52.19 (CH<sub>3</sub>), 47.52 (CH<sub>3</sub>), 24.73 (CH<sub>2</sub>), 19.11 (CH<sub>2</sub>). **MS m/z (ES<sup>+</sup>):** MS m/z (ES<sup>+</sup>) 285 (M<sup>+</sup>, 100).

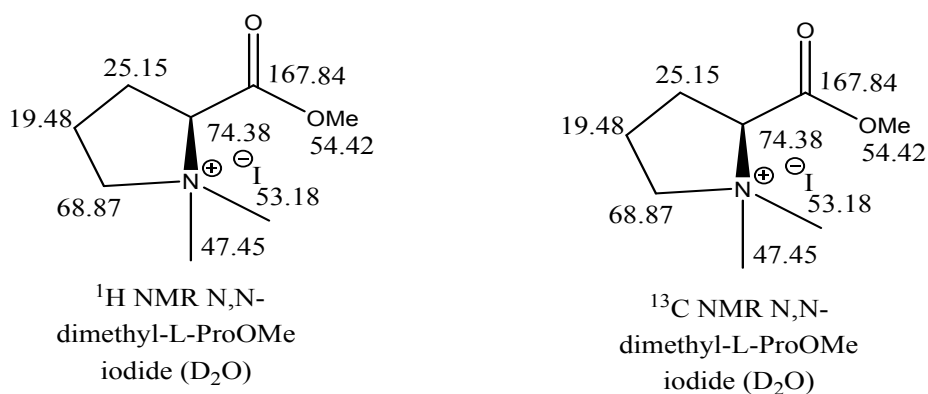

**Figure S3.**  $^1\text{H}$  NMR and  $^{13}\text{C}$  NMR of N,N dimethyl Pro-OMeBF<sub>4</sub>.

## **Materials Characterization**

### **Powder X-ray diffraction**

Powder X-ray diffraction (PXRD) pattern was recorded on a Bruker D8 Advance diffractometer equipped with a scintillation counter detector with Cu K $\alpha$  radiation ( $\lambda = 0.15184$  nm) applying  $2\theta$  step size of 0.0200 and counting time of 1s per step.

### **Raman spectroscopy**

Raman spectra was recorded using a Witec (focus innovations) Raman Microscope operating with an objective (Nikon, 10x/0.25,  $\infty$ /-WD 6.1) and an excitation wavelength of 532 nm with an intensity of 3.5 mW.

### **Thermogravimetric analysis**

Thermogravimetric analysis (TGA) measurement was performed using a thermo microbalance TG 209 F1 Libra (Netzsch, Selb, Germany). A platinum crucible was used for the measurement of 10 mg of a sample in synthetic air flow of 10 ml min<sup>-1</sup>. The sample was heated to 1000 °C with a heating rate of 10 K min<sup>-1</sup>. The data was recorded and analyzed by the Proteus (6.0.0) software package.

## Supplementary Figures

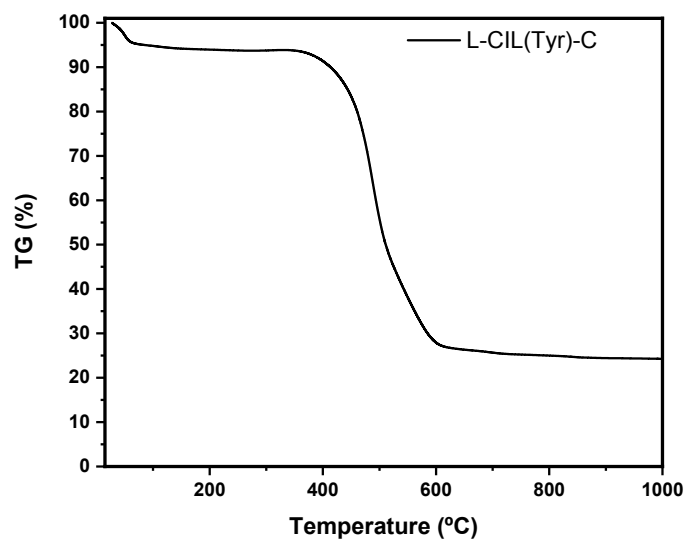

**Figure S4.** Thermal analysis of L-CIL(Tyr)-C under synthetic air.

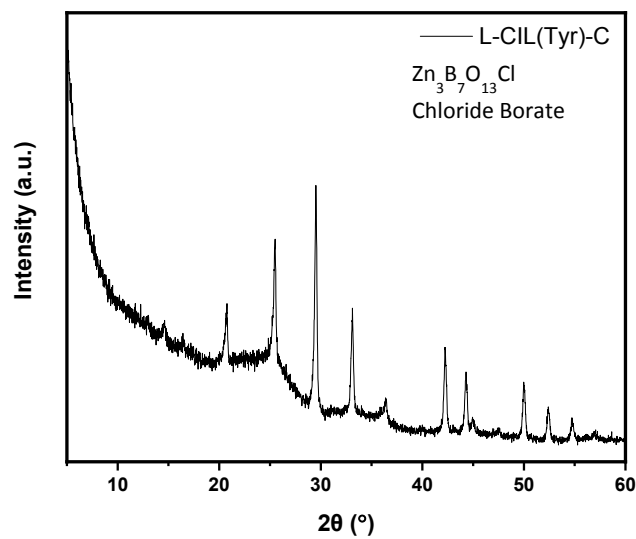

**Figure S5.** Powder X-ray diffraction pattern of L-CIL(Tyr)-C.

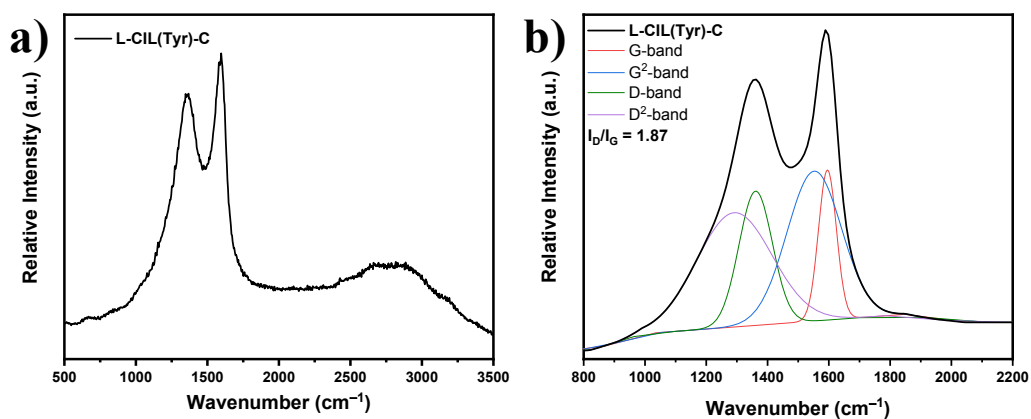

**Figure S6.** Raman spectrum (a), and fitted Raman spectrum (b) of L-CIL(Tyr)-C.

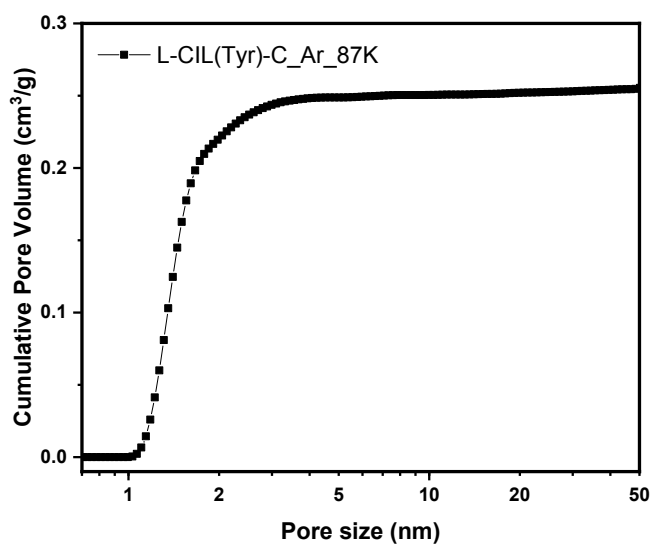

**Figure S7.** Cumulative QSDFT (argon on carbon with cylindrical/spherical pores at 77 K, adsorption branch kernel) pore size distribution.

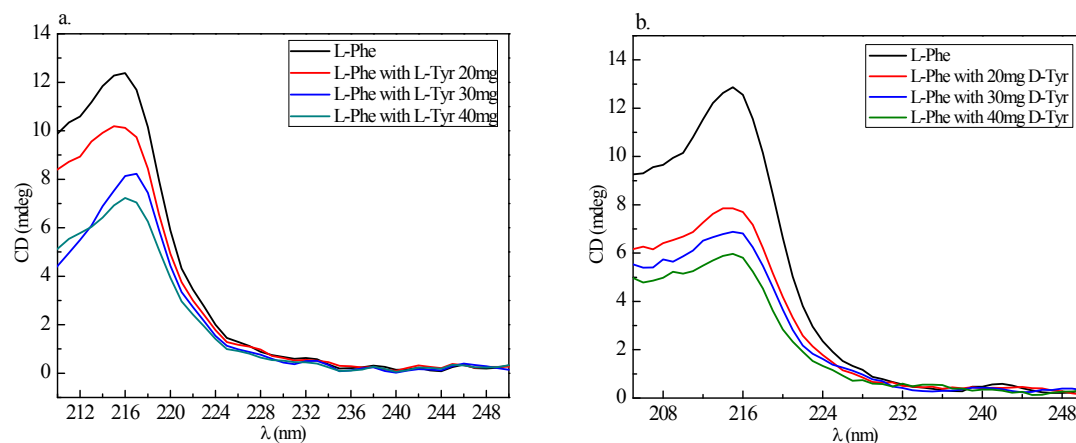

**Figure S8.** CD measurements for L-Phe probe without (black line) and with 20 (red), 30 (blue) and 40 (green) mg of L-CIL(Tyr)-C (a), and D-CIL(Tyr)-C (b).

## Supplementary Tables

**Table S1.**

Porosity data summary of L-CIL(Tyr)-C.

| $SSA_{BET}^{[a]}$ | $V_{Micro + Meso}^{[b]}$ | $V_{Micro}^{[c]}$ | Average Pore | Total pore          |
|-------------------|--------------------------|-------------------|--------------|---------------------|
| ( $m^2/g$ )       | ( $cm^3/g$ )             | ( $cm^3/g$ )      | Size (nm)    | volume ( $cm^3/g$ ) |
| 624.99            | 0.26                     | 0.22              | 1.69         | 0.26                |

[a] Specific surface area calculated using the BET equation ( $p/p_0 = 0.006 - 0.078$ ).

[b] Micro- and mesopore volume calculated at  $p/p_0 = 0.95$ .

[c] Micropore volume calculated from the cumulative pore volume up to a diameter of 2 nm (QSDFT method for Ar adsorbed on carbon with cylindrical/sphere pore shape at 87 K, adsorption branch kernel).
